# Supplementary material
Source: PubMed Central journal article supplement (PMC3012973)

**Fig. S1.** Three large fragments encompassing the full-length Rubicon (Myc tagged) were coexpressed with Flag-tagged hVps34 in HEK 293T cells. The cell extracts from these cells were immunoprecipitated with anti-Flag M2 beads, followed by Western blotting with Flag (hVps34) and Myc (Rubicon fragments) antibodies.

**Fig. S2.** The expression of N terminus of Rubicon suppresses LC3 puncta formation. (A). Vector alone, the N-terminal region (1-300aa), and the C-terminal region (181-972) of Rubicon were co-expressed with GFP-LC3 in U<sub>2</sub>OS cells. GFP-LC3 puncta were observed under a fluorescence microscope. (B). Quantitative analysis (summarized from 100 cells) of GFP-LC3 puncta in cells described in (A).

**Fig. S3.** Rubicon depletion promotes the fusion between autophagosome and endolysosomes. Myc-LC3 construct was co-expressed with either GFP-Rab5-WT or GFP-Rab7-WT into Rubicon knockdown (KD) or control cells (WT). 24 hours post-transfection, cells were fixed and stained for Myc-LC3 using a monoclonal antibody against Myc (9E10) and a Rhodamine-red conjugated secondary antibody. Endogenous LAMP-1 was stained by a rabbit antibody and followed by FITC-conjugated secondary antibody. Scale bar (10 $\mu$ m).

**Fig. S4.** Rubicon protein level was detected in Rubicon wild type, Doxycycline (DOX) inducible RNAi knockdown (KD), or Rubicon (RNAi resistant) complemented (OE) cells by anti-Rubicon antibody.

## Figure S1. Sun et al.

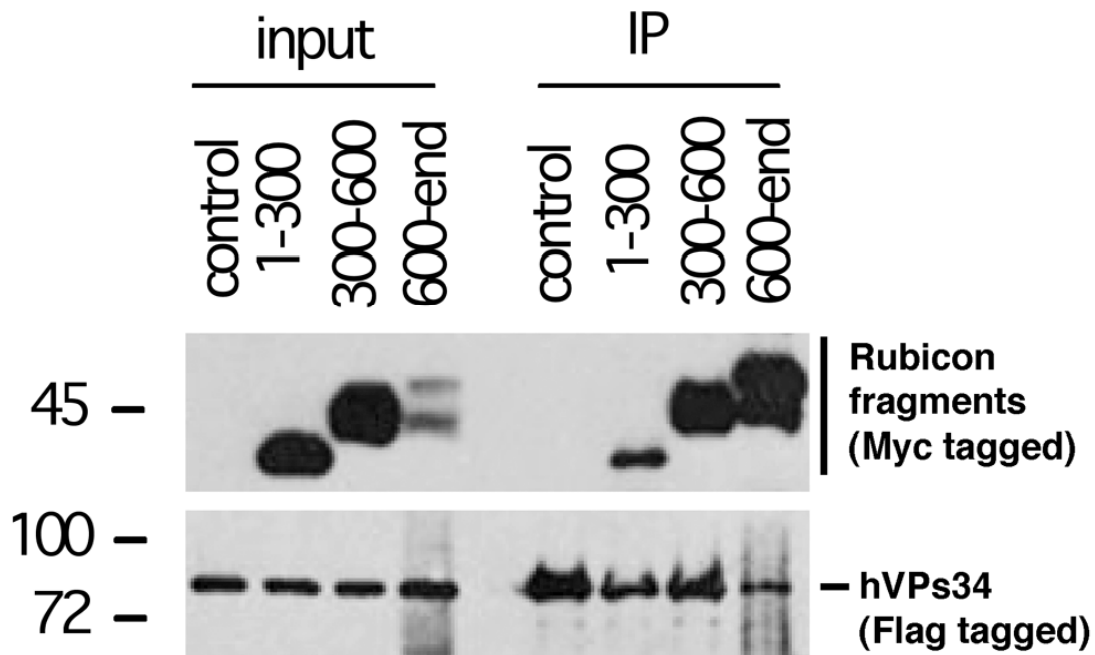

**Figure S2. Sun et al.**

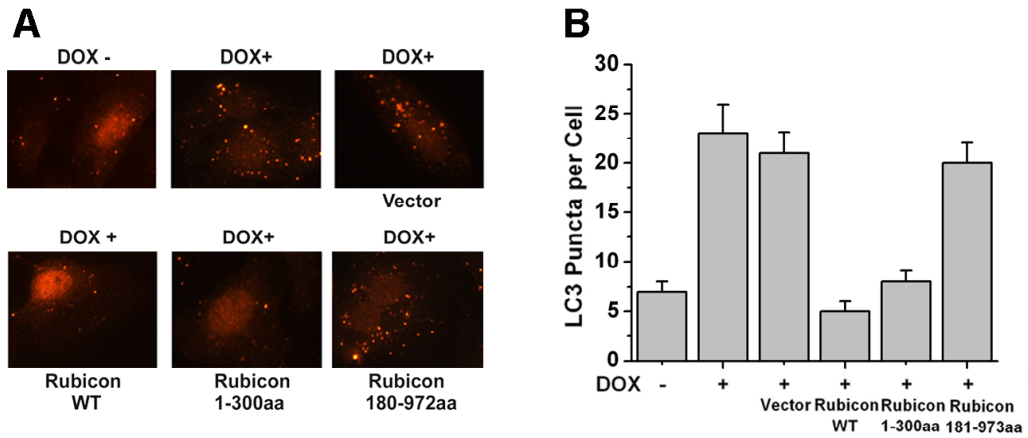

**Figure S3. Sun et al.**

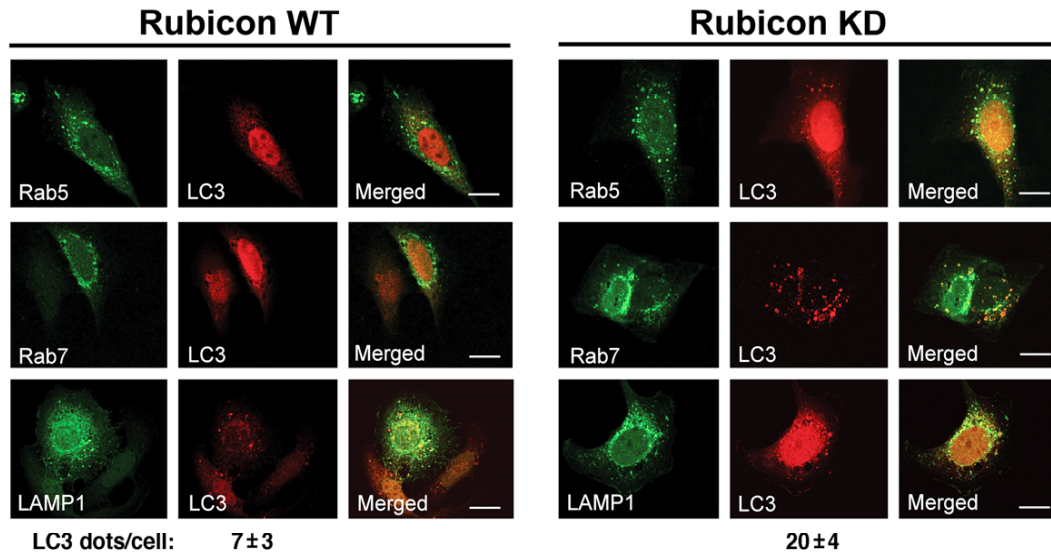

**Figure S4. Sun et al.**

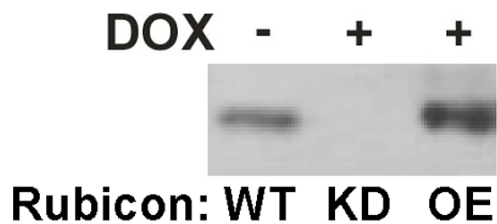

Supplement: supp_M110.126425_jbc.M110.126425-1.pdf [file supp_M110.126425_jbc.M110.126425-1.pdf]
